# Supplementary material for: Polydopamine assisted functionalization of boronic acid on magnetic nanoparticles for the selective extraction of ribosylated metabolites from urine
Source: Royal Society of Chemistry journal article supplement (doi:10.1039/c6ra28369a), 2017-01-01
Supplement: c6ra28369a1.pdf [file c6ra28369a1.pdf]

*Electronic Supporting Information*  
*for*

**Polydopamine Assisted Functionalization of Boronic Acid on Magnetic Nanoparticles for  
the Selective Extraction of Ribosylated Metabolites from Urine**

Abrar Mohyuddin, Dilshad Hussain, Muhammad Najam-ul-Haq\*

Division of Analytical Chemistry, Institute of Chemical Sciences, Bahauddin Zakariya  
University, Multan (60800), Pakistan.

\* Corresponding Author

Prof. Dr. M. Najam-ul-Haq

Division of Analytical Chemistry

Institute of Chemical Sciences

Bahauddin Zakariya University

Multan 60800 Pakistan

Tel.: +92 306 7552653

Email: [najamulhaq@bzu.edu.pk](mailto:najamulhaq@bzu.edu.pk)

**Fig. S1** FTIR spectra of materials (A)  $\text{Fe}_3\text{O}_4$  and (B)  $\text{Fe}_3\text{O}_4$ @PDA-FPBA nanoparticles

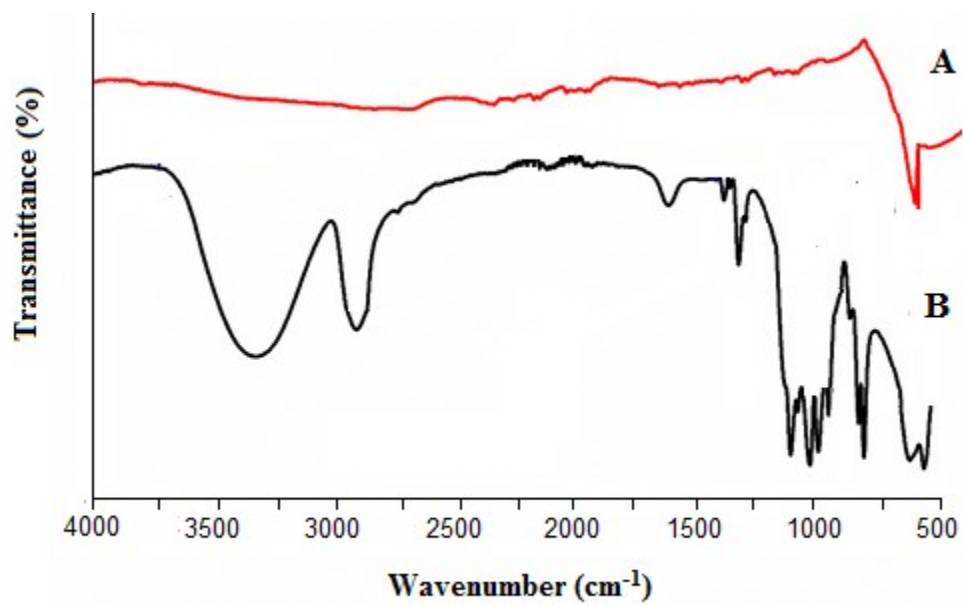

**Fig. S2** LC-UV chromatogram of standard nucleosides to assess the retention times prior to enrichment process

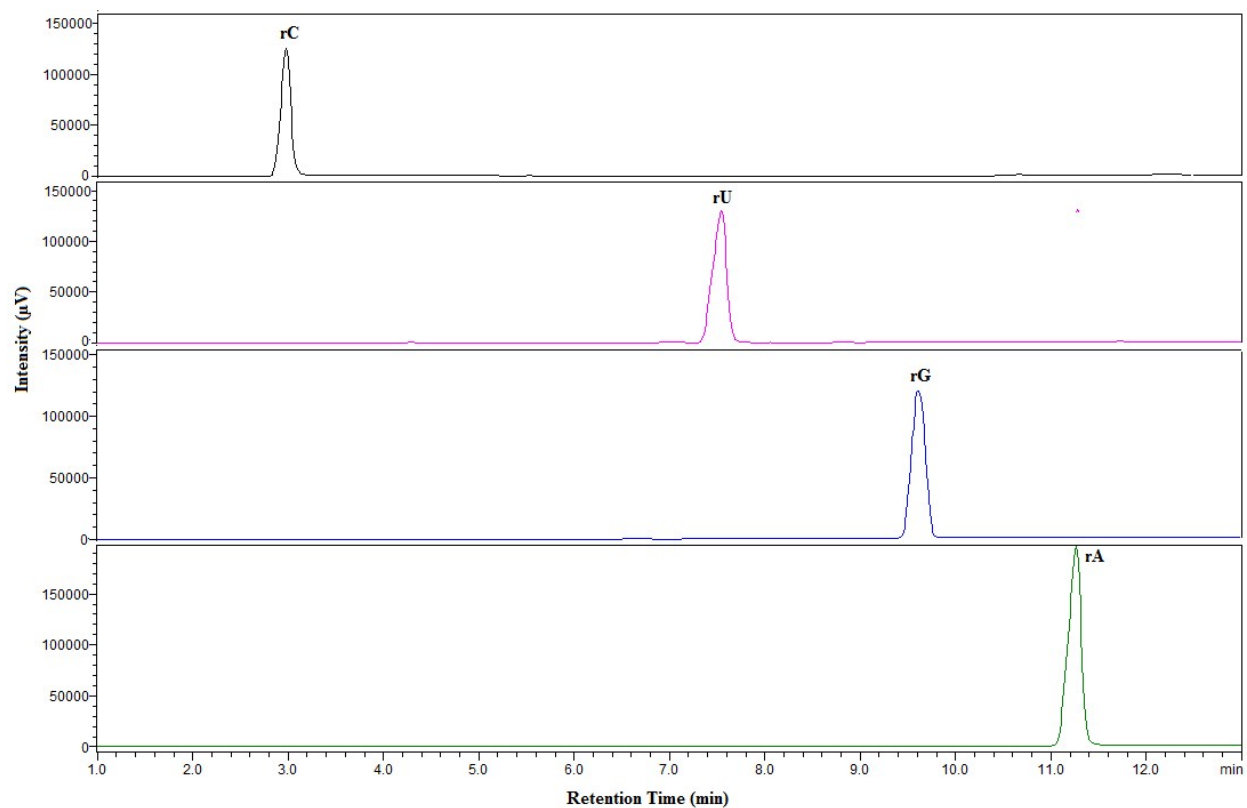

**Fig. S3** Extracted ion chromatogram of identified nucleosides from human urine

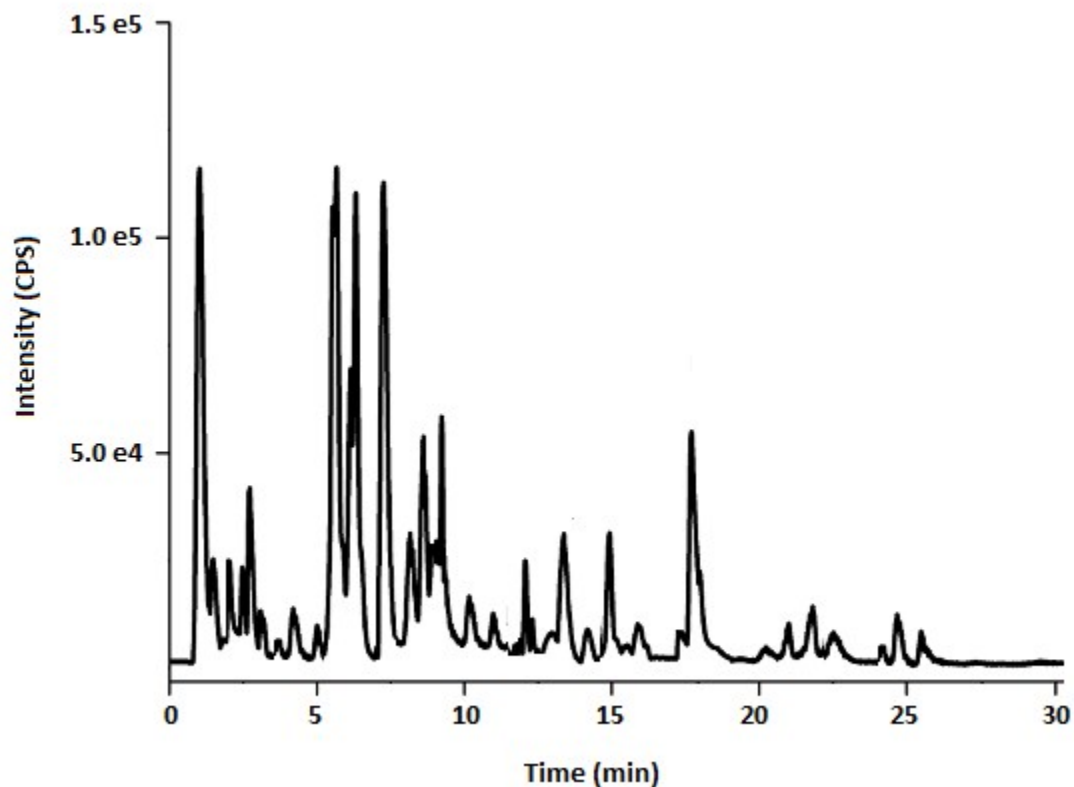

**Table S1** Detail of age and gender of lung cancer patients and healthy controls

| No                 | Gender | Age |
|--------------------|--------|-----|
| <b>Lung Cancer</b> |        |     |
| 1                  | Female | 53  |
| 2                  | Female | 66  |
| 3                  | Female | 51  |
| 4                  | Male   | 38  |
| 5                  | Male   | 54  |
| 6                  | Male   | 53  |
| 7                  | Male   | 62  |
| 8                  | Male   | 59  |
| 9                  | Male   | 52  |
| 10                 | Male   | 50  |

---

**Healthy Controls**

|    |        |    |
|----|--------|----|
| 1  | Female | 53 |
| 2  | Female | 66 |
| 3  | Female | 51 |
| 4  | Female | 38 |
| 5  | Female | 54 |
| 6  | Female | 53 |
| 7  | Male   | 62 |
| 8  | Male   | 59 |
| 9  | Male   | 52 |
| 10 | Male   | 50 |

---

**Table S2** MRM parameters for the analysis of standard nucleosides

---

| Compounds               | Precursor ion | Product ion | DP<br>(V) | EP<br>(V) | CE<br>(V) | CXP<br>(V) |
|-------------------------|---------------|-------------|-----------|-----------|-----------|------------|
| Adenosine (A)           | 268.0         | 136.0       | 24        | 6         | 24        | 5          |
| Cytidine (C)            | 244.2         | 112.2       | 24        | 6         | 22        | 5          |
| Guanosine (G)           | 284.2         | 152.2       | 28        | 6         | 20        | 5          |
| Uridine (U)             | 245.2         | 113.2       | 30        | 5         | 20        | 4          |
| 1-Methyladenosine (m1A) | 282.1         | 152.0       | 25        | 10        | 25        | 3          |
| 5-Methyluridine (m5U)   | 259.2         | 127.2       | 20        | 6         | 20        | 4          |

---

**Table S3** Comparison of adsorption capacity of Fe<sub>3</sub>O<sub>4</sub>@PDA-FPBA with previously reported materials

| No. | Material                                                   | Nucleoside | Adsorption Capacity (µg/g) | Reference  |
|-----|------------------------------------------------------------|------------|----------------------------|------------|
| 1   | Borated Titania                                            | Adenosine  | 2000                       | 1          |
| 2   | Boronic Acid Avidity on Dendrimer Nanoparticles            | Adenosine  | 1.75                       | 2          |
| 3   | Titania SPE Column                                         | Adenosine  | 6000                       | 3          |
| 4   | Fe <sub>3</sub> O <sub>4</sub> @SiO <sub>2</sub> @PEI-FPBA | Adenosine  | 1340                       | 4          |
| 5   | Boronic Acid Functionalized Magnetic Attapulgite           | Adenosine  | 13780                      | 5          |
| 6   | Hybrid TiO <sub>2</sub> -ZrO <sub>2</sub> Nanoparticles    | Adenosine  | 35                         | 6          |
| 7   | BA Functionalized Magnesia-Zirconia Composite              | Adenosine  | 123.5                      | 7          |
|     |                                                            | Cytidine   | 114.8                      |            |
|     |                                                            | Guanidine  | 103.5                      |            |
|     |                                                            | Uridine    | 107.8                      |            |
| 8   | Fe <sub>3</sub> O <sub>4</sub> microspheres                | Adenosine  | 43.9                       | 8          |
|     |                                                            | Cytidine   | 48.9                       |            |
|     |                                                            | Guanidine  | 41.1                       |            |
|     |                                                            | Uridine    | 43.4                       |            |
| 9   | Zr-Fe <sub>3</sub> O <sub>4</sub> microspheres             | Adenosine  | 142.1                      | 8          |
|     |                                                            | Cytidine   | 156.2                      |            |
|     |                                                            | Guanidine  | 159.4                      |            |
|     |                                                            | Uridine    | 108.5                      |            |
| 10  | Fe <sub>3</sub> O <sub>4</sub> @PDA-FPBA                   | Adenosine  | 197.3                      | This study |
|     |                                                            | Cytidine   | 183.9                      |            |
|     |                                                            | Guanidine  | 163.1                      |            |
|     |                                                            | Uridine    | 186.5                      |            |

**Table S4** Ion-pairs with neutral loss detected by LC-MS/MS after extraction with Fe<sub>3</sub>O<sub>4</sub>@PDA-FPBA nanoparticles

| No. | Retention Time (min) | Precursor ions | Product ions |
|-----|----------------------|----------------|--------------|
| 1   | 2.9                  | 244.1115       | 112.1203     |
| 2   | 2.4                  | 255.1029       | 123.0665     |
| 3   | 2.3                  | 288.1985       | 156.0097     |
| 4   | 2.5                  | 288.9656       | 157.0401     |
| 5   | 2.7                  | 301.0751       | 169.0332     |
| 6   | 3.5                  | 274.1034       | 142.0633     |
| 7   | 4.5                  | 257.9985       | 126.0670     |
| 8   | 4.7                  | 286.1385       | 154.0980     |
| 9   | 5.6                  | 345.9935       | 214.0861     |
| 10  | 5.0                  | 261.0512       | 129.0134     |
| 11  | 6.3                  | 302.5920       | 170.0829     |
| 12  | 6.9                  | 284.1020       | 152.0812     |
| 13  | 7.9                  | 247.0909       | 115.1501     |
| 14  | 8.5                  | 326.0937       | 194.0287     |
| 15  | 14.8                 | 298.0952       | 136.0603     |
| 16  | 16.1                 | 384.1142       | 252.1081     |
| 17  | 17.9                 | 282.3101       | 150.1009     |
| 18  | 10.0                 | 269.0881       | 137.2984     |
| 19  | 10.9                 | 271.1009       | 139.1569     |
| 20  | 12.6                 | 272.0842       | 140.0419     |
| 21  | 12.9                 | 296.1331       | 164.0911     |
| 22  | 17.6                 | 288.3212       | 126.6546     |
| 23  | 11.7                 | 271.1032       | 139.0527     |
| 24  | 13.5                 | 285.1025       | 153.1190     |
| 25  | 14.0                 | 251.9986       | 136.1228     |
| 26  | 14.4                 | 286.1034       | 154.0771     |
| 27  | 14.3                 | 285.1177       | 153.0760     |
| 28  | 15.9                 | 300.1007       | 168.1294     |
| 29  | 14.3                 | 313.1302       | 151.0722     |
| 30  | 14.4                 | 269.0873       | 137.0450     |

|    |      |          |                                |
|----|------|----------|--------------------------------|
| 31 | 18.1 | 258.1310 | 126.0417                       |
| 32 | 15.6 | 247.0901 | 115.0487                       |
| 33 | 14.3 | 317.1012 | 185.0753                       |
| 34 | 15.0 | 304.1801 | 172.0319                       |
| 35 | 20.5 | 426.1756 | 294.1331,<br>193.0837,150.0752 |
| 36 | 20.8 | 298.1175 | 166.0743,<br>148.0633          |
| 37 | 21.7 | 299.8727 | 168.0931                       |
| 38 | 23.3 | 257.1163 | 125.0690                       |
| 39 | 23.5 | 336.1636 | 204.1260                       |
| 40 | 23.5 | 326.1455 | 194.0995                       |
| 41 | 24.3 | 300.0992 | 168.1360                       |
| 42 | 25.5 | 314.1532 | 182.1290                       |
| 43 | 15.2 | 328.1092 | 196.0666                       |
| 44 | 15.5 | 318.1039 | 172.0792                       |
| 45 | 16.6 | 328.0099 | 196.2276                       |
| 46 | 16.6 | 326.1480 | 194.1060,<br>166.0744          |
| 47 | 16.6 | 333.0921 | 201.0496                       |
| 48 | 17.1 | 272.1222 | 140.0834                       |
| 49 | 17.2 | 413.1721 | 281.1013                       |
| 50 | 17.7 | 301.0799 | 169.0369                       |
| 51 | 18.0 | 314.1120 | 182.0700                       |
| 52 | 19.2 | 312.1103 | 164.0913,<br>150.0792          |
| 53 | 20.0 | 358.1430 | 226.1031                       |
| 54 | 25.8 | 337.2192 | 175.1176                       |
| 55 | 23.3 | 257.1163 | 125.0690                       |
| 56 | 16.6 | 333.0921 | 201.0496                       |
| 57 | 25.6 | 337.1390 | 175.0853                       |
| 58 | 17.6 | 301.0799 | 169.0369                       |
| 59 | 16.6 | 333.0921 | 201.0496                       |
| 60 | 15.2 | 328.1092 | 196.0666                       |
| 61 | 14.3 | 285.1177 | 153.0760                       |
| 62 | 11.5 | 271.1009 | 139.0596                       |
| 63 | 4.6  | 346.1235 | 214.0861                       |
| 64 | 16.6 | 326.1480 | 194.1060                       |



## References

1. S.-T. Wang, D. Chen, J. Ding, B.-F. Yuan and Y.-Q. Feng, *Chem. Eur. J.*, 2013, **19**, 606–612.
2. H. Wang, Z. Bie, C. Lu and Z. Liu, *Chem. Sci.*, 2013, **4**, 4298–4303.
3. S.-T. Wang, W. Huang, W. Lu, B.-F. Yuan and Y.-Q. Feng, *Anal. Chem.*, 2013, **85**, 10512–10518.
4. H. Li, Y. Shan, L. Qiao, A. Dou, X. Shi and G. Xu, *Anal. Chem.* 2013, **85**, 11585–11592.
5. T. Cheng, H. Li, Y. Ma, X. Liu and H. Zhang, *Anal. Bioanal. Chem.*, 2015, **407**, 3525–3529.
6. Q. Wu, D. Wu and Y. Guan, *Anal. Chem.*, 2014, **86**, 10122–10130.
7. H.-b. He, Y.-r. Sun, B. Li, Q.-w. Yu, T.-l. Wang and Y.-q. Feng, *Anal. Methods*, 2013, **5**, 1435–1441.
8. H. Fan, P. Chen, C. Wang and Y. Wei, *J. Chromatogr. A*, 2016, **1448**, 20–31.
